# Supplementary material for: Enhancing Mass spectrometry-based tumor immunopeptide identification: machine learning filter leveraging HLA binding affinity, aliphatic index and retention time deviation
Source: PubMed Central journal article supplement — Comput Struct Biotechnol J. 2024 Feb 3;23:859–69. doi: 10.1016/j.csbj.2024.01.023 (PMC10864759; doi:10.1016/j.csbj.2024.01.023), 2024-02-03
Supplement: mmc1.pdf [file mmc1.pdf]

## Supplemental Data

### **Enhancing Mass spectrometry-based tumor immunopeptide identification: machine learning filter leveraging HLA binding affinity, aliphatic index and retention time deviation**

Feifei Wei, Taku Kouro, Yuko Nakamura, Hiroki Ueda, Susumu Iizumi, Kyoko Hasegawa, Yuki Asahina, Takeshi Kishida, Soichiro Morinaga, Hidetomo Himuro, Shun Horaguchi, Kayoko Tsuji, Yasunobu Mano, Norihiro Nakamura, Takeshi Kawamura, and Tetsuro Sasada

#### **Contents**

**Table S1.** Patient list

**Table S2.** CandiSeq list of training set

**Table S3.** CandiSeq list of test set

**Table S4.** List of overlapping peptides with more than 8 amino acid residues in the current study dataset (combination of training and test sets)

**Table S5.** Results of cut-off analysis

**Figure S1.** MS/MS spectra of HCS

**Figure S2.** Selection of Hydrophobicity for predicting standard retention time

**Figure S3.** Count of overall detected peptides from patients with pancreas and kidney cancer

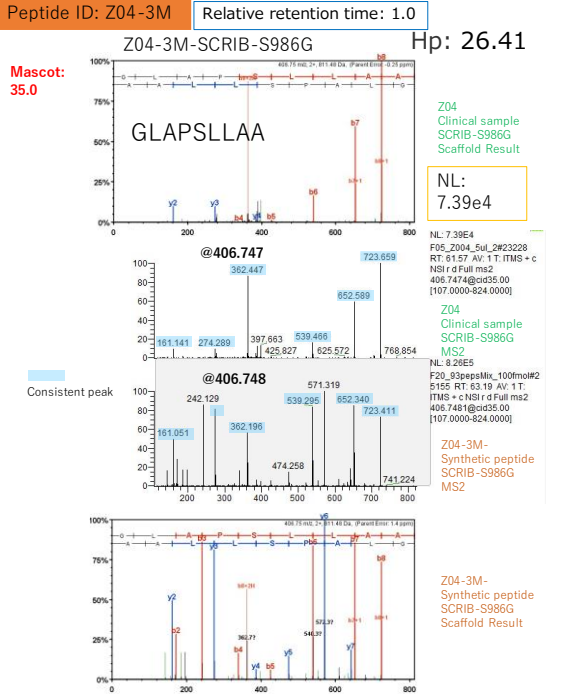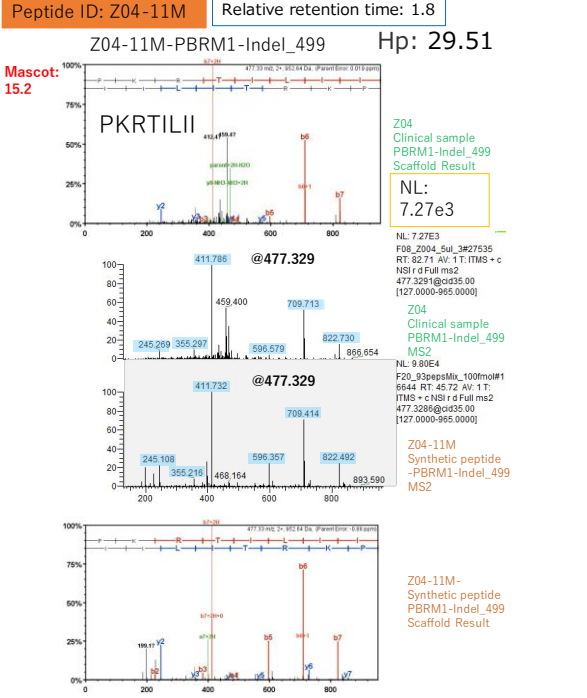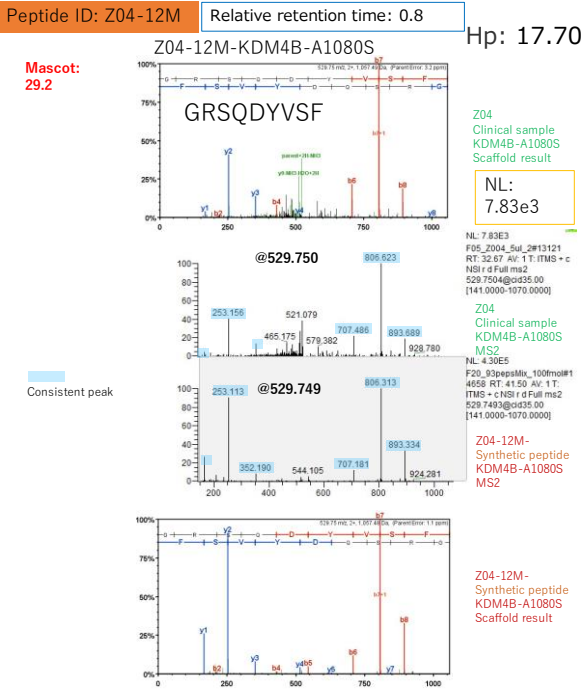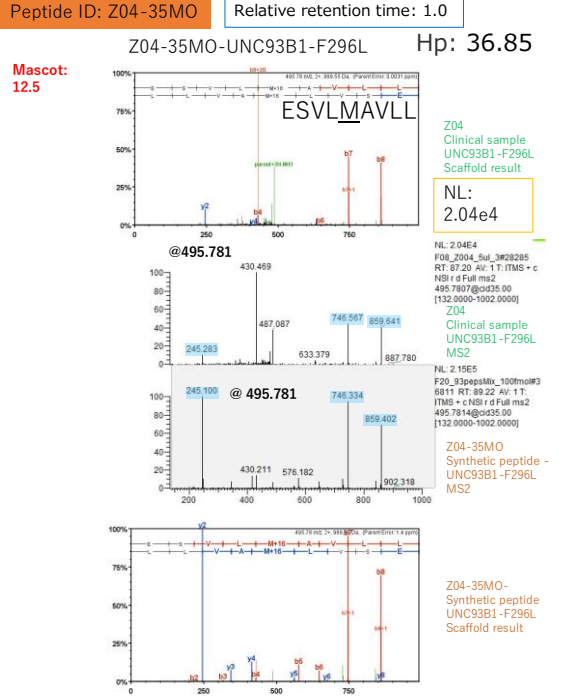

Peptide ID: Z20-16M

Relative retention time: 1.0

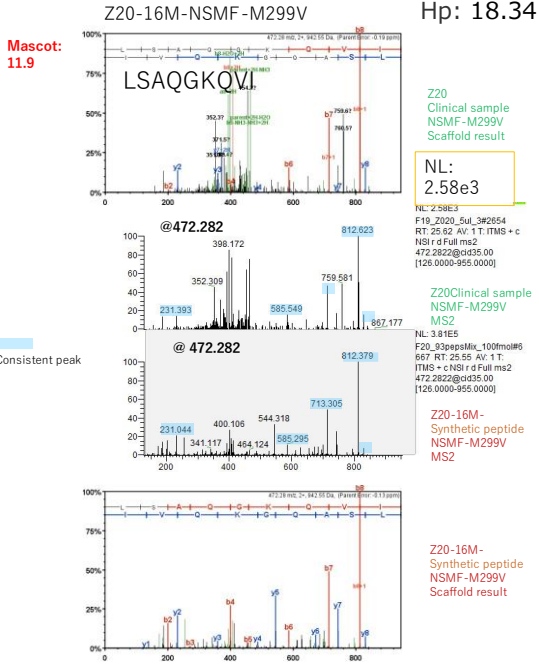

Peptide ID: Z19-15M

Relative retention time: 0.7

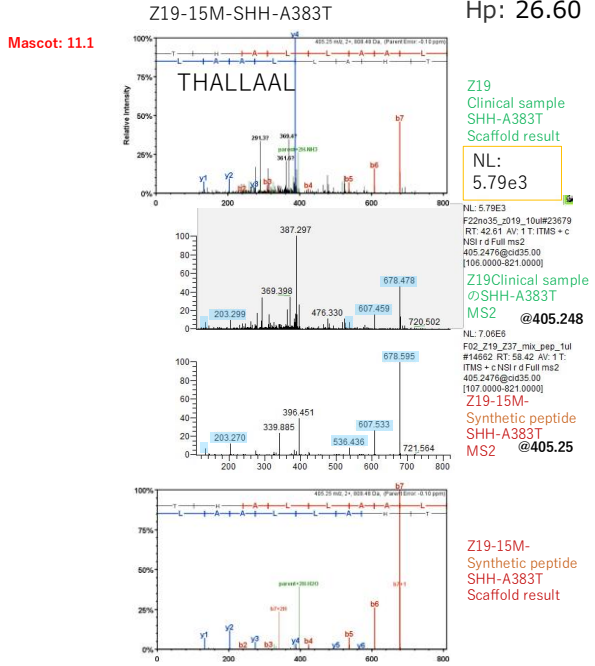

Peptide ID: Z19-17M

Relative retention time: 1.3

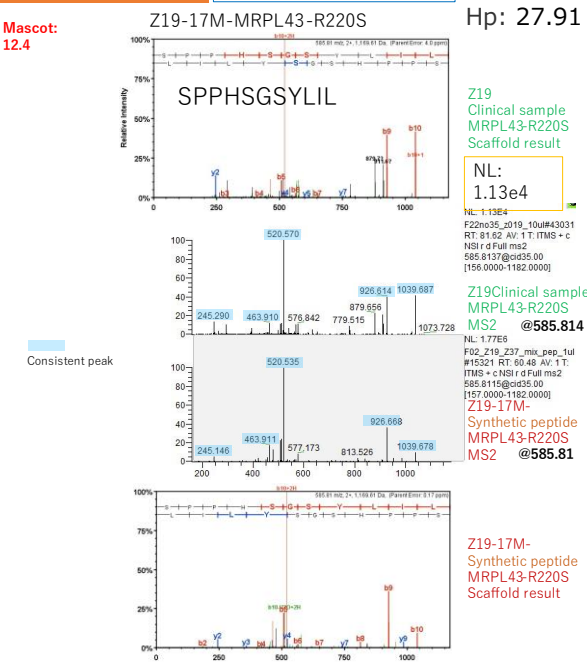

Peptide ID: Z19-18M

Relative retention time: 0.1

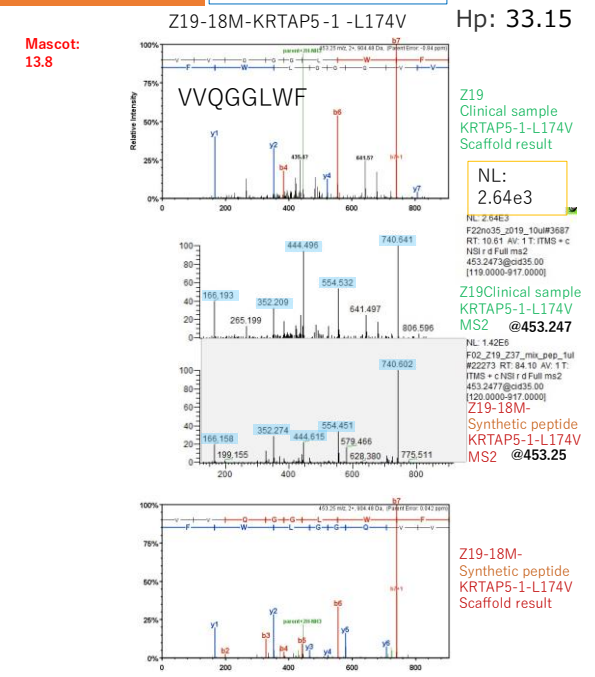

Peptide ID: Z34-2M

Relative retention time: 1.3

Z34-2M-FAM221A-Indel\_167

Hp: 16.68

Mascot: 14.9

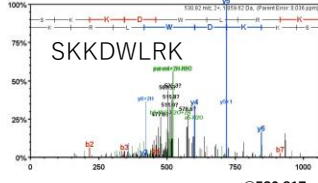

Z34  
Clinical sample  
FAM221A-  
Indel\_167  
Scaffold result  
NL:  
1.79e3

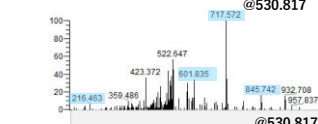

Z34Clinical sample  
のFAM221A-  
Indel\_167 MS2

Consistent peak

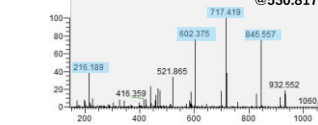

Z34-2M-  
Synthetic peptide  
FAM221A-Indel\_167  
MS2

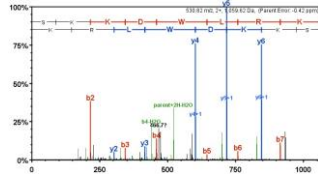

Z34-2M-  
Synthetic peptide  
FAM221A-  
Indel\_167  
Scaffold result

Peptide ID: Z35-13M

Relative retention time: 1.3

Z35-13M-NYAP1-A761P

Hp: 21.58

Mascot: 14.5

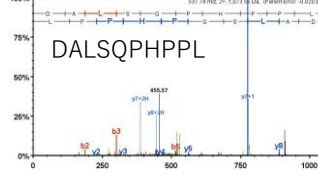

Z35  
Clinical sample  
NYAP1-A761P  
Scaffold result

NL:  
2.15e4

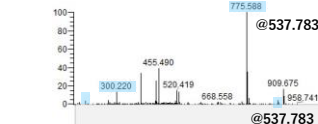

Z35  
Clinical sample  
NYAP1-A761P  
MS2

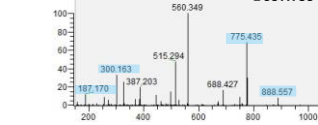

Z35-13M-  
Synthetic peptide  
NYAP1-A761P  
MS2

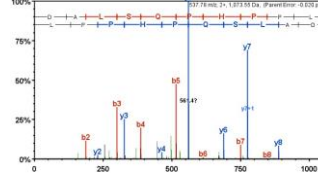

Z35-13M-  
Synthetic peptide  
NYAP1-A761P  
Scaffold result

Peptide ID: Z35-16M

Relative retention time: 0.9

Z35-16M-SLC12A4-R712W

Hp: 41.82

Mascot: 11.5

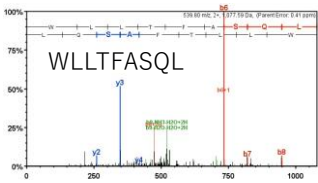

Z35  
Clinical sample  
SLC12A4-R712W  
Scaffold result

NL:  
1.02e4

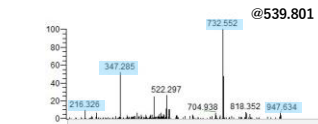

Z35Clinical sample  
のSLC12A4R712W  
MS2

Consistent peak

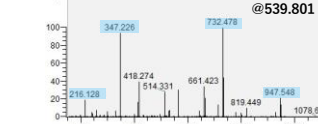

Z35-16M-  
Synthetic peptide  
SLC12A4-R712W  
MS2

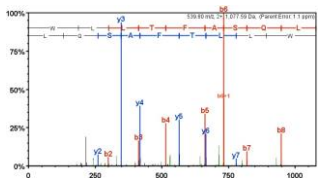

Z35-16M-  
Synthetic peptide  
SLC12A4-R712W  
Scaffold result

Peptide ID: Z37-2M

Relative retention time: 1.2

Z37-2M-GPR64-M360L

Hp: 26.64

Mascot: 19.3

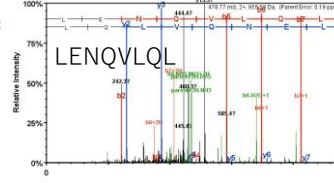

Z37  
Clinical sample  
GPR64-M360L  
Scaffold result

NL:  
2.58e3

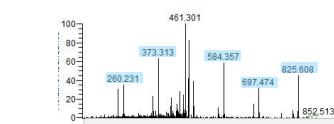

Z37  
Clinical sample  
GPR64-M360L MS2

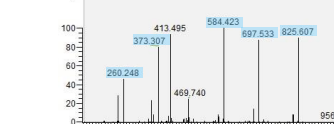

Z37-2M  
Synthetic peptide -  
GPR64-M360L  
MS2 @478.774

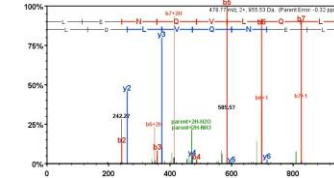

Z37-2M-  
Synthetic peptide  
GPR64-M360L  
Scaffold result

Peptide ID: Z37-14M Relative retention time: 0.9

Mascot: 11.7

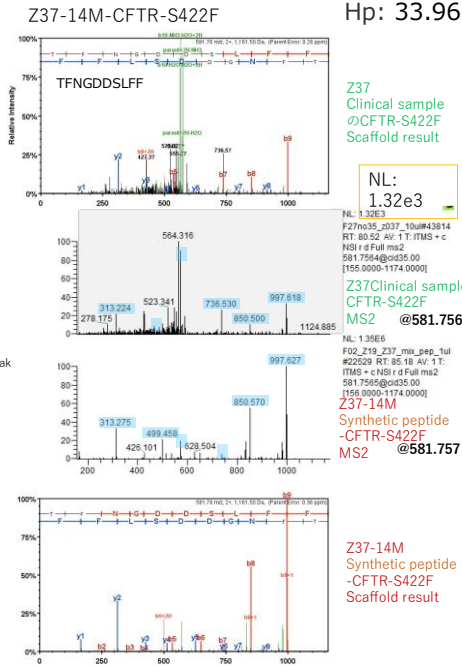

Peptide ID: Z37-23M Relative retention time: 0.8

Mascot: 11.2

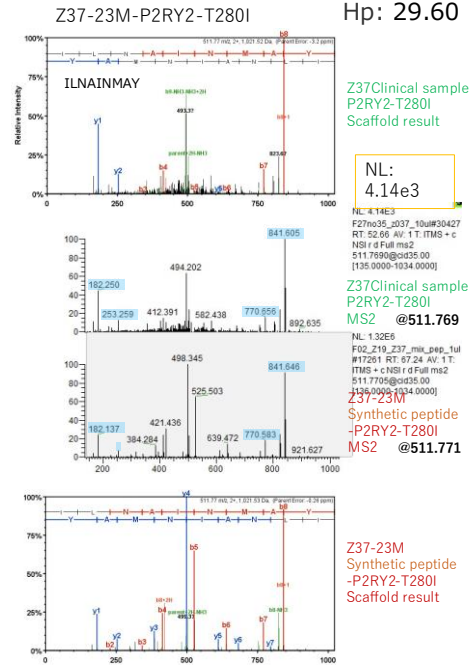

Peptide ID: P01-3M Relative retention time: 0.9

Mascot: 28.6

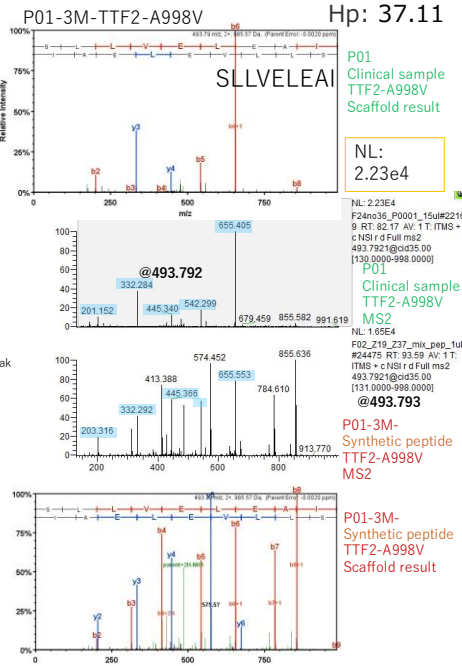

Peptide ID: P01-4M Relative retention time: 1.1

Mascot: 25.6

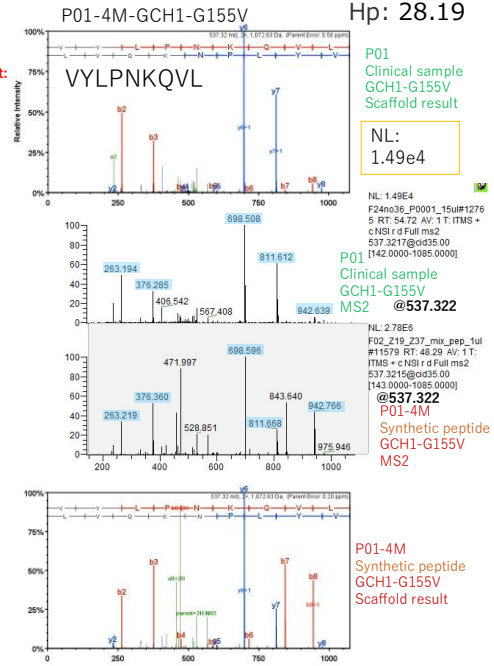

Peptide ID: P01-5M

Relative retention time: 0.8

Mascot: 21.3

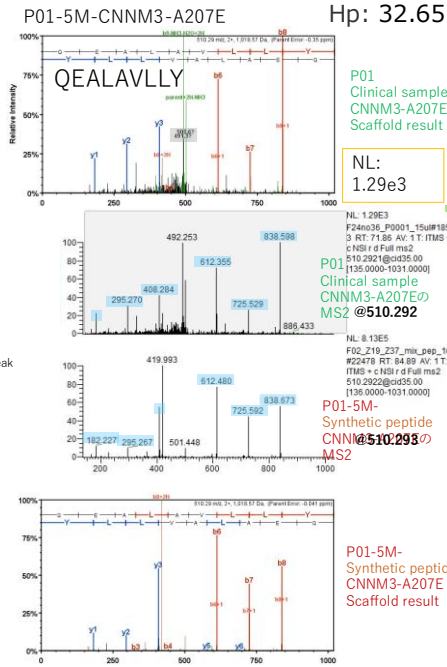

Peptide ID: P01-6M

Relative retention time: 0.8

Mascot: 24.1

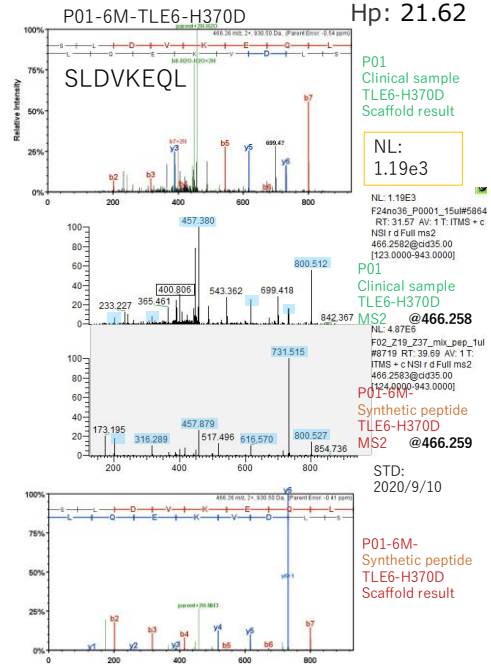

Peptide ID: P03-7M

Relative retention time: 1.0

Mascot: 19.1

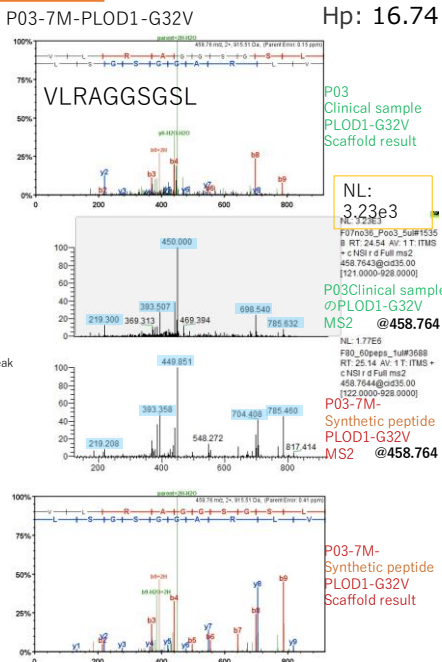

Peptide ID: P03-19M

Relative retention time: 1.1

Mascot: 15.5

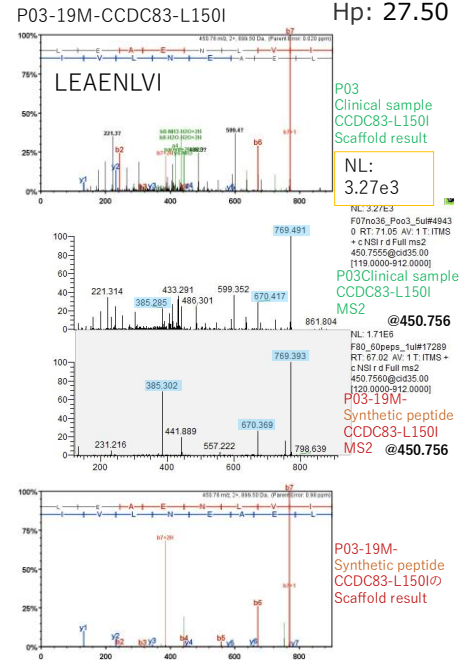

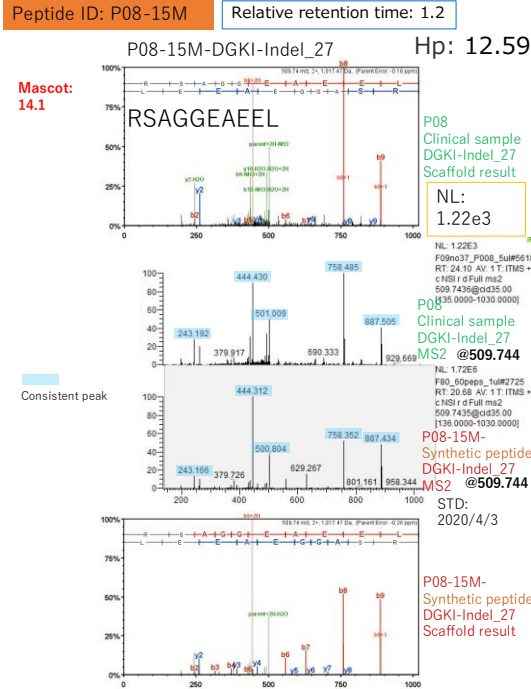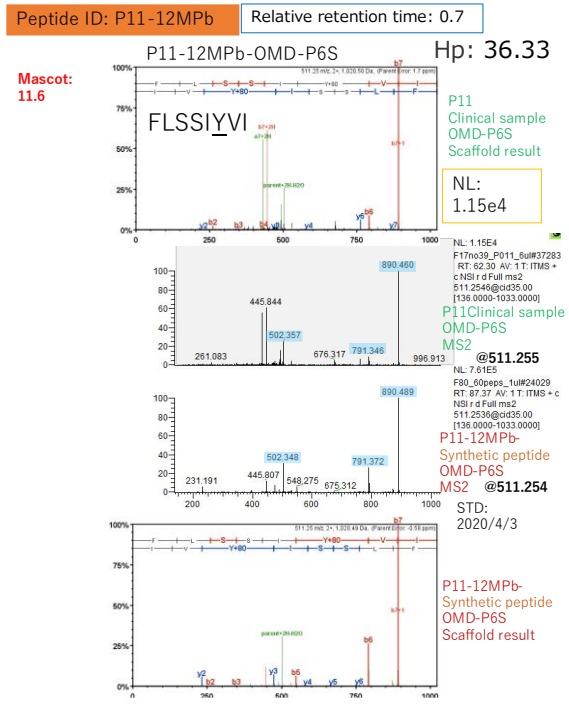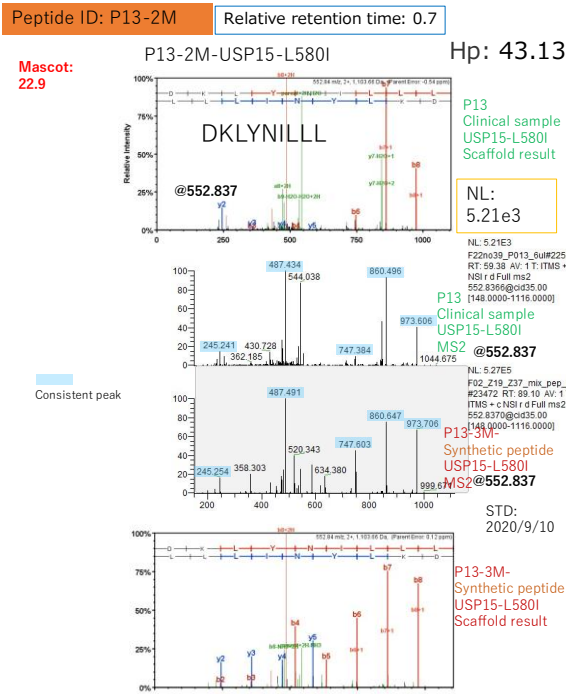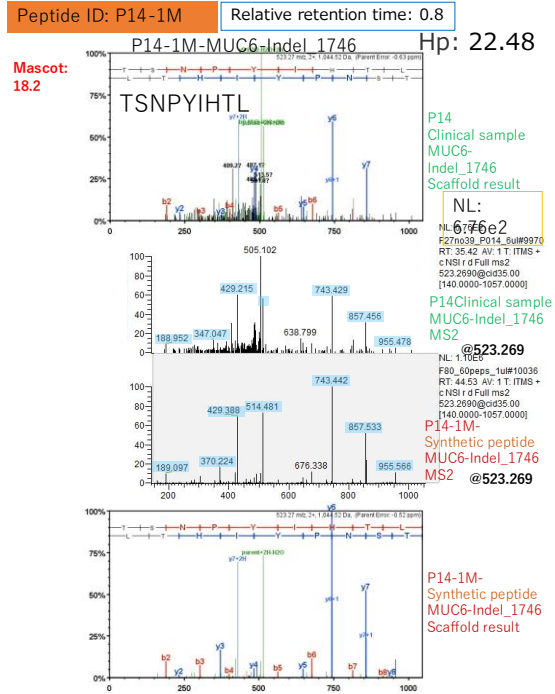

Figure S1. MS/MS spectra of HCS. HCS, reliable identifications with highly consistent MS/MS spectra.

**a**

| x                | y         | R-squared | F-statistic | p-value     |
|------------------|-----------|-----------|-------------|-------------|
| Hydrophobicity   | SynRT_HSC | 0.88      | 164.9       | 1.07E-11*** |
| Gravy            | SynRT_HSC | 0.55      | 26.89       | 3.37E-05*** |
| pl               | SynRT_HSC | 0.35      | 11.61       | 0.002523**  |
| AliphaticIndex   | SynRT_HSC | 0.30      | 9.521       | 0.005403**  |
| Entrp            | SynRT_HSC | 0.05      | 1.236       | 0.2783      |
| InstabilityIndex | SynRT_HSC | 0.05      | 1.175       | 0.2901      |
| MinRank          | SynRT_HSC | 0.02      | 0.4739      | 0.4984      |

**b**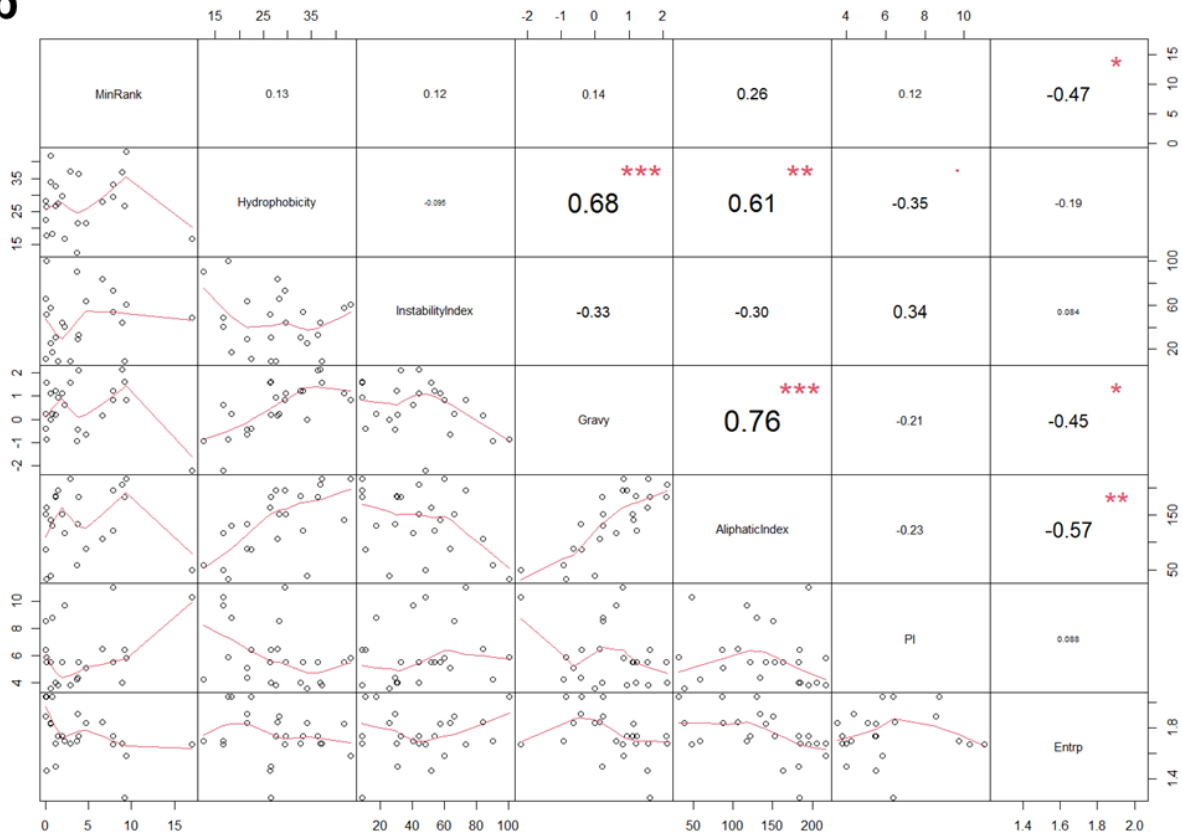

**Figure S2.** Selection of Hydrophobicity for predicting standard retention time: **a** outcome of univariate linear regression with the standard retention time (SynRT\_HSC, y) for features predicted based on sequence information (x) across the 24 sequences exhibiting highly consistent MS/MS spectra (HCS). The features are ranked based on the R-squared value of the regression



line, and the linearity between Hydrophobicity and SynRT\_HCS is optimal; **b** results of Spearman correlation analysis between features. Spearman coefficients plus the significance level were shown in the upper triangular, and the bivariate scatter plots with a fitted line were displayed in the lower part below the diagonal. Features exhibiting considerable linearity with SynRT\_HCS (Gravy, pI and AliphaticIndex) display significant or strong correlations with Hydrophobicity. Considering the limited sample size of HCS and the risk of overfitting caused by multicollinearity in the multivariable regression model, the univariable linear regression model (as shown in **Figure 2**) using Hydrophobicity was selected to give a relatively robust performance. Significance level: \*\*\* P-value 0 - 0.001; \*\* P-value 0.001 - 0.01; \* P-value 0.01 - 0.05; • P-value 0.05 - 0.10.

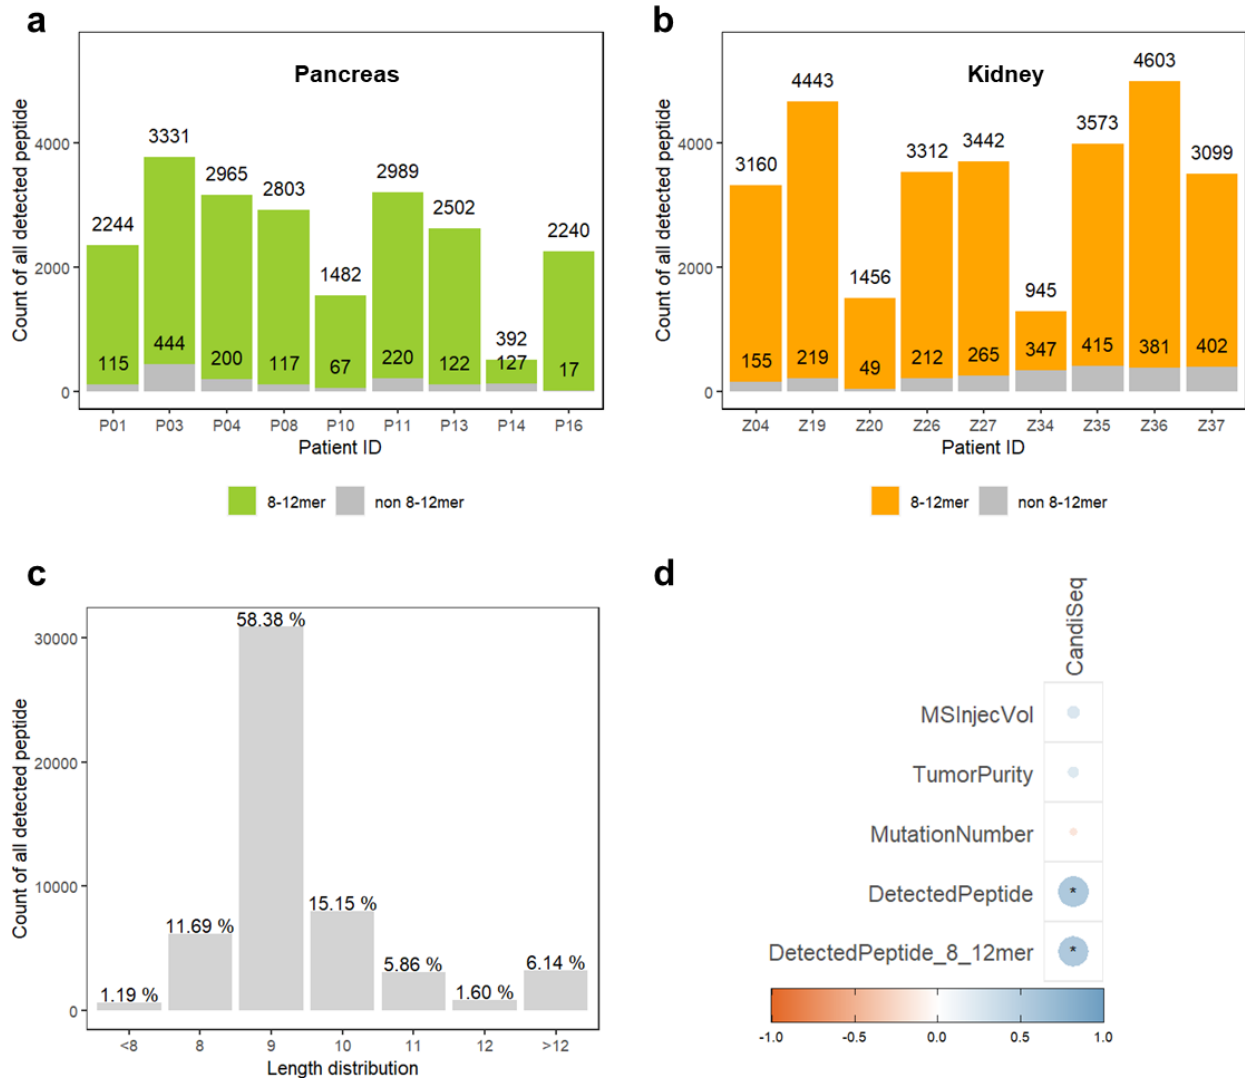

**Figure S3.** Count of overall detected peptides (Mascot  $\geq 10$ ) from patients with **a** pancreas and **b** kidney cancer; **c** the length distribution of all detected peptides; **d** Spearman's correlation coefficients between count of CandiSeqs (CandiSeq), tumor tissue input (MSInjecVol), tumor purity (TumorPurity), mutation number (MutationNumber), count of overall detected peptides (DetectPeptide), and count of 8-12mers in overall detected peptides (DetectedPeptide\_8\_12mer). Number labels in **a** and **b**, count number; number labels in **c**, percentage in total detected peptides; circle size in **d**, |Spearman's correlation coefficient|; circle color, red: negative, blue: positive value; \* p-value  $< 0.05$ , \*\* p-value  $< 0.01$ , \*\*\* p-value  $< 0.001$ .
